## Mitochondrial redox signalling at a glance

Yvonne Collins, Edward T. Chouchani, Andrew M. James, Katja E. Menger, Helena M. Cochemé and Michael P. Murphy

*Journal of Cell Science* 125, 1837  
© 2012. Published by The Company of Biologists Ltd  
doi: 10.1242/jcs.110486

There was an error published in *J. Cell Sci.* **125**, 801-806.

The URL that links to the accompanying poster panels is incorrect.

The correct link is as follows:

<http://jcs.biologists.org/lookup/suppl/doi:10.1242/jcs.098475/-/DC1>

We apologise for this error.
